# Supplementary material for: Deformability measurement of red blood cells using a microfluidic channel array and an air cavity in a driving syringe with high throughput and precise detection of subpopulations
Source: Royal Society of Chemistry journal article supplement (doi:10.1039/c5an01988e), 2015-11-30

## Supplementary Material

### Deformability measurement of red blood cells using microfluidic channel array and air cavity in driving syringe with high throughput and precise detection of subpopulations

Yang Jun Kang<sup>a</sup>, Young-Ran Ha<sup>b</sup>, and Sang-Joon Lee<sup>c\*</sup>

<sup>a</sup>Department of Mechanical Engineering, Chosun University, Gwangju, Republic of Korea

<sup>b</sup>Division of Integrative Biosciences and Biotechnology, Pohang University of Science and Technology (POSTECH), Pohang, Republic of Korea

<sup>c</sup>Department of Mechanical Engineering, Pohang University of Science and Technology (POSTECH), Pohang, Republic of Korea

\*Address: Department of Mechanical Engineering, Pohang University of Science and Technology (POSTECH), 77 Cheongam-Ro, Nam-gu, Pohang, Gyeongbuk 790-784, Republic of South Korea. Fax: +82-54-279-3199

\*E-mail: [sjlee@postech.ac.kr](mailto:sjlee@postech.ac.kr)

#1: MOVIE-1: Figure 1C (a microfluidic device)

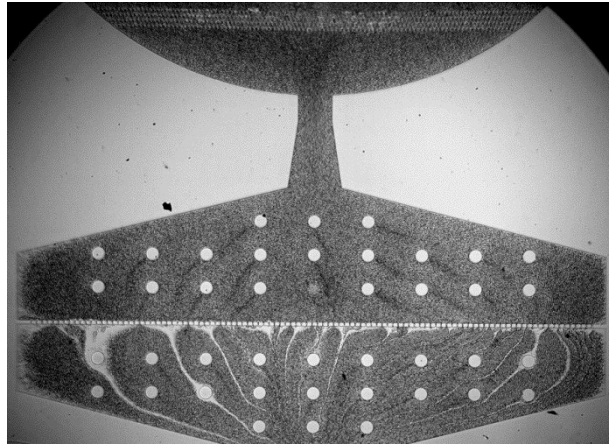

#2: MOVIE-2: Figure 1D (normal blood)

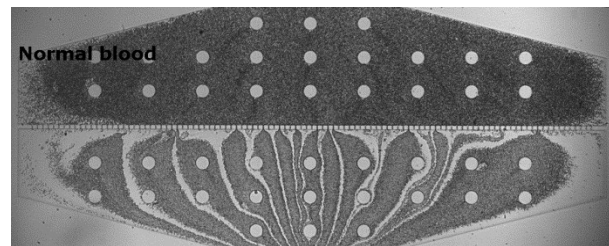

#MOVIE-3: (Blood cells passing through the microfluidic channel array)

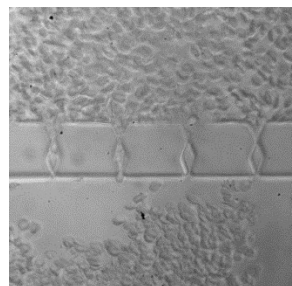

#MOVIE-4: Figure 4A (*P. falciparum*-infected blood sample)

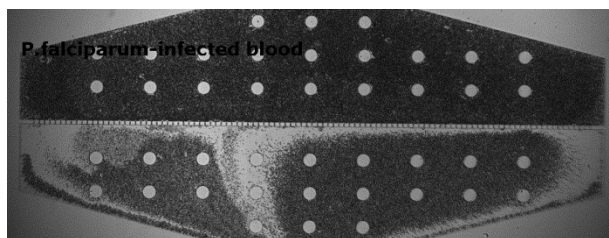

Supplement: c5an01988e1.pdf [file c5an01988e1.pdf]
